# Supplementary material for: Comprehensive Evaluation of High-Resolution Satellite Precipitation Products over the Qinghai–Tibetan Plateau Using the New Ground Observation Network
Source: MDPI journal article supplement (doi:10.3390/rs15133381), 2023-07-02
Supplement: s1 [file s1]

## Supplementary Materials

**Table S1.** Observation stations of National Tibetan Plateau Data Center used in this study

| ID  | Time range | Time step | References                                    | DOI                                                                                      |
|-----|------------|-----------|-----------------------------------------------|------------------------------------------------------------------------------------------|
| N1  | 2009-2017  | Daily     | Zhao, 2018                                    | 10.11888/AtmosphericPhysics.tpe.62.db.CSTR:18406.11.AtmosphericPhysics.tpe.62.db         |
| N2  | 2007-2017  | Daily     | Luo, 2018                                     | 10.11888/AtmosphericPhysics.tpe.68.db.CSTR:18406.11.AtmosphericPhysics.tpe.68.db         |
| N3  | 2011       | Daily     | Chen et al.; 2015; Chen et al.; 2014;         | 10.3972/heihe.110.2013.db.CSTR:18406.11.heihe.110.2013.db                                |
| N4  | 2007-2015  | Daily     | Hu et al.; 2015; Liu et al.; 2018; Li et al.; | 10.3972/water973.0279.db.CSTR:18406.11.water973.0279.db                                  |
| N5  | 2015-2017  | Daily     | Zhang, 2018                                   | 10.11888/Meteoro.tpd.270086.CSTR:18406.11.Meteoro.tpd.270086                             |
| N6  | 2003-2016  | Daily     | Wang, 2018                                    | 10.11888/AtmosEnviron.tpe.00000045.file.CSTR:18406.11.AtmosEnviron.tpe.00000045.file     |
| N7  | 2008-2018  | Daily     | Zhao, 2021                                    | 10.11888/Meteoro.tpd.271606.CSTR:18406.11.Meteoro.tpd.271606                             |
| N8  | 2006-2010  | Daily     | He, 2014                                      | 10.3972/heihe.073.2014.db.CSTR:18406.11.heihe.073.2014.db                                |
| N9  | 2006-2010  | Daily     | Gao, 2018                                     | 10.11888/AtmosphericPhysics.tpe.5.db.CSTR:18406.11.AtmosphericPhysics.tpe.5.db           |
| N10 | 2014-2018  | Daily     | Qin, 2018                                     | 10.11888/Glacio.tpd.270004.CSTR:18406.11.Glacio.tpd.270004                               |
| N11 | 2014-2018  | Daily     | Chen, 2019; Chen et al.; 2016                 | 10.11888/Meteoro.tpd.270460.CSTR:18406.11.Meteoro.tpd.270460                             |
| N12 | 2005-2008  | Daily     | Wang, 2018                                    | 10.11888/Ecology.tpe.13.db.CSTR:18406.11.Ecology.tpe.13.db                               |
| N13 | 2004-2018  | Daily     | Zhao et al.; 2021; Zhao et al.; 2021;         | 10.11888/Geocry.tpd.271107.CSTR:18406.11.Geocry.tpd.271107                               |
| N19 | 2005-2009  | Daily     | Zhao, 2018                                    | 10.11888/AtmosphericPhysics.tpe.74.db.CSTR:18406.11.AtmosphericPhysics.tpe.74.db         |
| N20 | 2014-2018  | Daily     | Zhao, 2018                                    | 10.11888/Meteoro.tpd.270084.CSTR:18406.11.Meteoro.tpd.270084                             |
| N21 | 2006-2017  | Daily     | Luo, 2019                                     | 10.11888/AtmosphericPhysics.tpe.249395.db.CSTR:18406.11.AtmosphericPhysics.tpe.249395.db |
| N22 | 2005-2012  | Daily     | Luo, 2019                                     | 10.11888/AtmosphericPhysics.tpe.249395.db.CSTR:18406.11.AtmosphericPhysics.tpe.249396.db |
| N23 | 2012-2015  | Daily     | Zhang, 2018                                   | 10.11888/Meteoro.tpd.270548.CSTR:18406.11.Meteoro.tpd.270548                             |
| N24 | 2012-2017  | Daily     | Zhang, 2018                                   | 10.11888/Meteoro.tpd.270005.CSTR:18406.11.Meteoro.tpd.270005                             |
| N30 | 2005-2008  | Daily     | Luo and Liu, 2018                             | 10.11888/Ecology.tpe.249285.db.CSTR:18406.11.Ecology.tpe.249285.db                       |

|     |           |        |                                            |                                                                                    |
|-----|-----------|--------|--------------------------------------------|------------------------------------------------------------------------------------|
| N31 | 2007-2014 | Daily  | Yang, 2018                                 | 10.11888/AtmosPhys.tpe.249477.db.CSTR:18406.11.AtmosPhys.tpe.249477.db             |
| N32 | 2007-2014 | Daily  | Yang, 2018                                 | 10.11888/AtmosPhys.tpe.249477.db.CSTR:18406.11.AtmosPhys.tpe.249477.db             |
| N33 | 2005-2016 | Daily  | Ma, 2018; Ma et al.; 2011; Ma et al.;      | 10.11888/AtmosEnviron.tpe.0000014.file.CSTR:18406.11.AtmosEnviron.tpe.0000014.file |
| N34 | 2019-2020 | Hourly | Niu, 2021                                  | 10.11888/Meteoro.tpd.271282.CSTR:18406.11.Meteoro.tpd.271282                       |
| N35 | 2020      | Hourly | Hou, 2022                                  | 10.11888/Atmos.tpd.272018.CSTR:18406.11.Atmos.tpd.272018                           |
| N36 | 2007-2009 | Hourly | Ma et al.; 2015; Xu et al.; 2015           | 10.3972/water973.0289.db.CSTR:18406.11.water973.0289.db                            |
| N37 | 2018      | Hourly | Zhao and Zhang, 2019                       | 10.11888/Geogra.tpd.270165.CSTR:18406.11.Geogra.tpd.270165                         |
| N38 | 2018      | Hourly | Zhao and Zhang, 2021                       | 10.11888/Meteoro.tpd.271379.CSTR:18406.11.Meteoro.tpd.271379                       |
|     |           |        |                                            | 10.11888/Meteoro.tpd.270319.CSTR:18406.11.Meteoro.tpd.270319                       |
|     |           |        |                                            | 10.11888/Meteoro.tpd.270319.CSTR:18406.11.Meteoro.tpd.270319                       |
| N39 | 2016-2019 | Hourly | Yang, 2020                                 | 10.11888/Meteoro.tpd.270319.CSTR:18406.11.Meteoro.tpd.270319                       |
|     |           |        |                                            | 10.11888/Meteoro.tpd.270319.CSTR:18406.11.Meteoro.tpd.270319                       |
|     |           |        |                                            | 10.11888/Meteoro.tpd.270319.CSTR:18406.11.Meteoro.tpd.270319                       |
| N44 | 2021      | Hourly | Li, 2022; Li et al.; 2018; Li et al.; 2016 | 10.11888/Atmos.tpd.272685.CSTR:18406.11.Atmos.tpd.272685                           |
| N45 | 2020-2021 | Hourly | Li, 2021; Li et al.; 2018; Li et al.; 2016 | 10.11888/Meteoro.tpd.271382.CSTR:18406.11.Meteoro.tpd.271382                       |
| N46 | 2017-2020 | Hourly | Chen et al.; 2022; Zhan et al.; 2022       | 10.11888/Atmos.tpd.272983.CSTR:18406.11.Atmos.tpd.272983                           |
| N71 | 2016      | Hourly | Yang, 2018; Yang et al.; 2017              | 10.11888/AtmosPhys.tpe.249475.db.CSTR:18406.11.AtmosPhys.tpe.249475.db             |
| N72 | 2016      |        |                                            |                                                                                    |

**Table S2.** Performance of each SPPs in detecting precipitation occurrence during different periods

| SPPs<br>Periods |        | CMO         | GPM         | MS          | PER  | CHI         | GaM         | GaN  | PDI  | PCS         | PDR         |
|-----------------|--------|-------------|-------------|-------------|------|-------------|-------------|------|------|-------------|-------------|
| POD             | Jan    | 0.19        | <u>0.05</u> | <b>0.77</b> | 0.69 | 0.39        | 0.17        | 0.15 | 0.40 | 0.74        | 0.61        |
|                 | Feb    | 0.31        | <u>0.08</u> | <b>0.80</b> | 0.71 | 0.46        | 0.19        | 0.20 | 0.51 | 0.75        | 0.68        |
|                 | Mar    | 0.47        | <u>0.16</u> | <b>0.84</b> | 0.75 | 0.49        | 0.36        | 0.33 | 0.69 | 0.79        | 0.75        |
|                 | Apr    | 0.64        | <u>0.27</u> | <b>0.88</b> | 0.75 | 0.44        | 0.54        | 0.51 | 0.81 | 0.76        | 0.82        |
|                 | May    | 0.68        | 0.41        | <b>0.94</b> | 0.61 | <u>0.26</u> | 0.65        | 0.61 | 0.83 | 0.59        | 0.80        |
|                 | Jun    | 0.69        | 0.53        | <b>0.97</b> | 0.51 | <u>0.30</u> | 0.71        | 0.68 | 0.80 | 0.50        | 0.76        |
|                 | Jul    | 0.79        | 0.69        | <b>0.98</b> | 0.61 | <u>0.44</u> | 0.77        | 0.74 | 0.84 | 0.60        | 0.83        |
|                 | Aug    | 0.80        | 0.66        | <b>0.98</b> | 0.60 | <u>0.42</u> | 0.77        | 0.74 | 0.82 | 0.59        | 0.82        |
|                 | Sep    | 0.71        | 0.52        | <b>0.97</b> | 0.47 | <u>0.30</u> | 0.62        | 0.63 | 0.78 | 0.46        | 0.76        |
|                 | Oct    | 0.60        | 0.41        | <b>0.89</b> | 0.45 | <u>0.21</u> | 0.44        | 0.46 | 0.73 | 0.48        | 0.67        |
|                 | Nov    | 0.42        | 0.20        | <b>0.78</b> | 0.55 | 0.28        | <u>0.19</u> | 0.25 | 0.62 | 0.60        | 0.63        |
|                 | Dec    | 0.24        | <u>0.07</u> | <b>0.69</b> | 0.58 | 0.32        | 0.14        | 0.14 | 0.41 | 0.63        | 0.47        |
|                 | Warm   | 0.77        | 0.62        | <b>0.98</b> | 0.57 | <u>0.38</u> | 0.74        | 0.71 | 0.83 | 0.56        | 0.81        |
|                 | Cold   | 0.33        | <u>0.11</u> | <b>0.78</b> | 0.69 | 0.45        | 0.27        | 0.24 | 0.54 | 0.75        | 0.67        |
|                 | Annual | 0.70        | 0.53        | <b>0.96</b> | 0.61 | <u>0.38</u> | 0.64        | 0.62 | 0.79 | 0.60        | 0.79        |
| FAR             | Jan    | 0.23        | <b>0.01</b> | 0.24        | 0.42 | 0.14        | 0.10        | 0.08 | 0.20 | <u>0.44</u> | 0.34        |
|                 | Feb    | 0.36        | <b>0.03</b> | 0.30        | 0.50 | 0.21        | 0.12        | 0.10 | 0.30 | <u>0.52</u> | 0.42        |
|                 | Mar    | 0.44        | <b>0.06</b> | 0.36        | 0.54 | 0.26        | 0.23        | 0.20 | 0.46 | 0.56        | <u>0.57</u> |
|                 | Apr    | 0.54        | <b>0.12</b> | 0.47        | 0.51 | 0.21        | 0.34        | 0.30 | 0.54 | 0.49        | <u>0.59</u> |
|                 | May    | 0.53        | 0.12        | 0.56        | 0.36 | <b>0.11</b> | 0.44        | 0.39 | 0.55 | 0.34        | <u>0.59</u> |
|                 | Jun    | 0.43        | 0.19        | <u>0.71</u> | 0.24 | <b>0.12</b> | 0.45        | 0.38 | 0.50 | 0.25        | 0.52        |
|                 | Jul    | 0.42        | 0.30        | <u>0.77</u> | 0.30 | <b>0.19</b> | 0.44        | 0.36 | 0.50 | 0.30        | 0.57        |
|                 | Aug    | 0.43        | 0.24        | <u>0.77</u> | 0.25 | <b>0.15</b> | 0.43        | 0.35 | 0.44 | 0.25        | 0.51        |
|                 | Sep    | 0.37        | 0.15        | <u>0.67</u> | 0.16 | <b>0.09</b> | 0.34        | 0.28 | 0.37 | 0.15        | 0.39        |
|                 | Oct    | 0.46        | 0.13        | <u>0.48</u> | 0.18 | <b>0.06</b> | 0.19        | 0.20 | 0.33 | 0.19        | 0.33        |
|                 | Nov    | <u>0.40</u> | <b>0.05</b> | 0.27        | 0.25 | 0.06        | 0.10        | 0.13 | 0.27 | 0.26        | 0.28        |
|                 | Dec    | 0.28        | <b>0.02</b> | 0.19        | 0.29 | 0.09        | 0.06        | 0.07 | 0.15 | <u>0.30</u> | 0.22        |
|                 | Cold   | 0.40        | 0.21        | <u>0.72</u> | 0.22 | <b>0.13</b> | 0.40        | 0.33 | 0.43 | 0.22        | 0.48        |
|                 | Warm   | 0.32        | <b>0.03</b> | 0.27        | 0.43 | 0.17        | 0.12        | 0.11 | 0.26 | <u>0.44</u> | 0.37        |
|                 | Annual | 0.38        | <b>0.12</b> | <u>0.47</u> | 0.34 | 0.14        | 0.26        | 0.23 | 0.37 | 0.33        | 0.44        |
| FPR             | Jan    | 0.83        | 0.66        | <b>0.63</b> | 0.76 | 0.71        | <u>0.87</u> | 0.80 | 0.79 | 0.80        | 0.79        |
|                 | Feb    | <u>0.82</u> | <b>0.56</b> | 0.62        | 0.74 | 0.68        | 0.78        | 0.72 | 0.75 | 0.75        | 0.75        |
|                 | Mar    | <u>0.72</u> | <b>0.44</b> | 0.54        | 0.68 | 0.62        | 0.66        | 0.65 | 0.67 | 0.68        | 0.69        |
|                 | Apr    | <u>0.59</u> | <b>0.35</b> | 0.46        | 0.57 | 0.50        | 0.56        | 0.52 | 0.56 | 0.55        | 0.57        |
|                 | May    | 0.46        | <b>0.26</b> | 0.38        | 0.43 | 0.37        | <u>0.47</u> | 0.41 | 0.45 | 0.42        | 0.46        |
|                 | Jun    | 0.32        | <b>0.23</b> | 0.34        | 0.31 | 0.26        | <u>0.37</u> | 0.30 | 0.35 | 0.31        | 0.36        |
|                 | Jul    | 0.22        | 0.18        | 0.27        | 0.21 | <b>0.17</b> | <u>0.29</u> | 0.21 | 0.24 | 0.21        | 0.27        |
|                 | Aug    | 0.25        | <b>0.20</b> | 0.31        | 0.23 | 0.20        | <u>0.32</u> | 0.24 | 0.27 | 0.23        | 0.30        |
|                 | Sep    | 0.35        | <b>0.24</b> | 0.38        | 0.31 | 0.28        | <u>0.44</u> | 0.33 | 0.35 | 0.30        | 0.36        |
|                 | Oct    | 0.62        | <b>0.46</b> | 0.53        | 0.53 | 0.46        | <u>0.64</u> | 0.53 | 0.55 | 0.52        | 0.56        |
|                 | Nov    | 0.81        | <b>0.66</b> | 0.66        | 0.74 | 0.66        | <u>0.84</u> | 0.79 | 0.77 | 0.77        | 0.78        |

|          |        |             |             |             |             |             |             |             |             |      |             |
|----------|--------|-------------|-------------|-------------|-------------|-------------|-------------|-------------|-------------|------|-------------|
| CSI      | Dec    | 0.84        | 0.75        | <b>0.67</b> | 0.77        | 0.79        | <u>0.89</u> | 0.88        | 0.83        | 0.85 | 0.84        |
|          | Cold   | 0.27        | <b>0.20</b> | 0.32        | 0.25        | 0.21        | <u>0.34</u> | 0.25        | 0.29        | 0.25 | 0.31        |
|          | Warm   | <u>0.77</u> | <b>0.56</b> | 0.59        | 0.73        | 0.67        | 0.74        | 0.73        | 0.74        | 0.75 | 0.75        |
|          | Annual | <u>0.49</u> | <b>0.25</b> | 0.40        | 0.45        | 0.39        | 0.43        | 0.36        | 0.43        | 0.47 | 0.47        |
|          | Jan    | 0.08        | <u>0.04</u> | <b>0.32</b> | 0.16        | 0.16        | 0.07        | 0.08        | 0.14        | 0.17 | 0.17        |
|          | Feb    | 0.11        | <u>0.06</u> | <b>0.35</b> | 0.19        | 0.19        | 0.10        | 0.12        | 0.19        | 0.20 | 0.21        |
|          | Mar    | 0.21        | <u>0.14</u> | <b>0.43</b> | 0.25        | 0.23        | 0.19        | 0.19        | 0.28        | 0.27 | 0.28        |
|          | Apr    | 0.34        | <u>0.23</u> | <b>0.50</b> | 0.35        | 0.27        | 0.34        | 0.34        | 0.39        | 0.37 | 0.39        |
|          | May    | 0.44        | 0.35        | <b>0.60</b> | 0.40        | <u>0.22</u> | 0.42        | 0.43        | 0.49        | 0.39 | 0.46        |
|          | Jun    | 0.53        | 0.45        | <b>0.65</b> | 0.41        | <u>0.26</u> | 0.51        | 0.54        | 0.57        | 0.41 | 0.53        |
|          | Jul    | 0.65        | 0.59        | <b>0.72</b> | 0.52        | <u>0.40</u> | 0.59        | 0.63        | 0.66        | 0.51 | 0.64        |
|          | Aug    | 0.63        | 0.56        | <b>0.68</b> | 0.49        | <u>0.38</u> | 0.56        | 0.60        | 0.62        | 0.49 | 0.60        |
|          | Sep    | 0.51        | 0.44        | <b>0.61</b> | 0.38        | <u>0.26</u> | 0.43        | 0.49        | 0.55        | 0.38 | 0.52        |
|          | Oct    | 0.30        | 0.29        | <b>0.45</b> | 0.27        | <u>0.16</u> | 0.25        | 0.31        | 0.37        | 0.28 | 0.33        |
|          | Nov    | 0.13        | 0.12        | <b>0.29</b> | 0.15        | 0.15        | <u>0.08</u> | 0.11        | 0.18        | 0.17 | 0.18        |
|          | Dec    | 0.08        | <u>0.04</u> | <b>0.24</b> | 0.12        | 0.12        | 0.05        | 0.05        | 0.11        | 0.12 | 0.12        |
| Accuracy | Cold   | 0.60        | 0.53        | <b>0.67</b> | 0.47        | <u>0.34</u> | 0.54        | 0.58        | 0.61        | 0.47 | 0.59        |
|          | Warm   | 0.14        | <u>0.09</u> | <b>0.35</b> | 0.20        | 0.19        | 0.13        | 0.13        | 0.21        | 0.20 | 0.22        |
|          | Annual | 0.44        | 0.44        | <b>0.58</b> | 0.37        | <u>0.29</u> | 0.44        | 0.46        | 0.48        | 0.37 | 0.46        |
|          | Jan    | 0.67        | 0.81        | 0.75        | <u>0.55</u> | 0.80        | <b>0.83</b> | 0.83        | 0.76        | 0.58 | 0.66        |
|          | Feb    | 0.59        | 0.79        | 0.73        | <u>0.52</u> | 0.73        | <b>0.79</b> | 0.78        | 0.69        | 0.52 | 0.61        |
|          | Mar    | 0.58        | <b>0.76</b> | 0.74        | <u>0.51</u> | 0.67        | 0.69        | 0.70        | 0.60        | 0.51 | 0.54        |
|          | Apr    | 0.59        | 0.70        | <b>0.71</b> | 0.57        | 0.64        | 0.68        | 0.69        | 0.60        | 0.58 | <u>0.56</u> |
|          | May    | 0.62        | 0.67        | <b>0.72</b> | 0.62        | <u>0.59</u> | 0.67        | 0.67        | 0.64        | 0.62 | <u>0.59</u> |
|          | Jun    | 0.69        | 0.67        | <b>0.72</b> | 0.63        | <u>0.55</u> | 0.69        | 0.71        | 0.69        | 0.62 | 0.64        |
|          | Jul    | 0.73        | 0.71        | <b>0.76</b> | 0.67        | <u>0.59</u> | 0.71        | 0.73        | 0.74        | 0.65 | 0.72        |
|          | Aug    | 0.73        | 0.70        | <b>0.73</b> | 0.66        | <u>0.60</u> | 0.70        | 0.72        | 0.72        | 0.66 | 0.70        |
|          | Sep    | 0.70        | 0.69        | 0.70        | 0.67        | <u>0.59</u> | 0.69        | <b>0.71</b> | <b>0.71</b> | 0.66 | 0.69        |
|          | Oct    | <u>0.59</u> | 0.74        | 0.69        | 0.70        | 0.72        | <b>0.77</b> | 0.74        | 0.69        | 0.71 | 0.67        |
|          | Nov    | <u>0.58</u> | 0.80        | 0.74        | 0.68        | <b>0.85</b> | 0.84        | 0.80        | 0.72        | 0.72 | 0.71        |
|          | Dec    | 0.65        | 0.82        | 0.76        | <u>0.63</u> | 0.86        | <b>0.88</b> | 0.86        | 0.81        | 0.69 | 0.76        |
|          | Warm   | 0.71        | 0.69        | <b>0.73</b> | 0.66        | <u>0.58</u> | 0.70        | 0.72        | 0.72        | 0.65 | 0.69        |
|          | Cold   | 0.62        | <b>0.79</b> | 0.74        | <u>0.56</u> | 0.77        | <b>0.79</b> | <b>0.79</b> | 0.72        | 0.58 | 0.64        |
|          | Annual | 0.67        | <b>0.75</b> | 0.74        | <u>0.63</u> | 0.67        | 0.74        | 0.74        | 0.70        | 0.63 | 0.66        |

Note: The underline means the worst performance, while bold font represents the best performance.
